# Supplementary material for: Removing BaP from soil by biochar prepared with medicago and corn straw using batch and solid-phase extraction method
Source: Royal Society of Chemistry journal article supplement (doi:10.1039/d2ay00823h), 2022-01-01
Supplement: d2ay00823h1.pdf [file d2ay00823h1.pdf]

## 1. Chromatogram of BaP and calibration curve determined by HPLC (Agilent 1200)

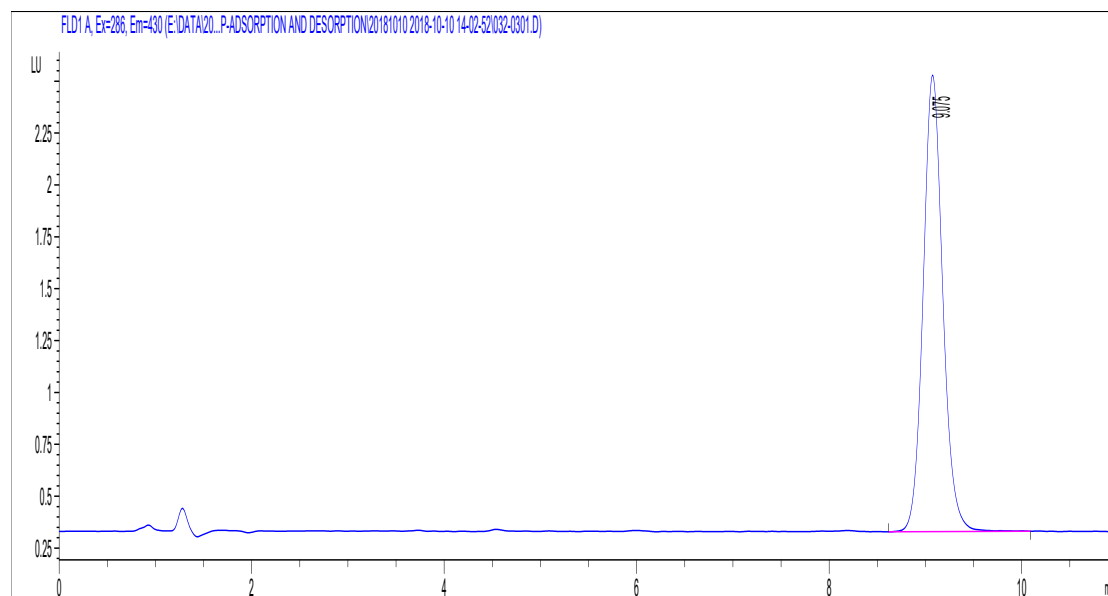

Fig.S1 the chromatogram of BaP

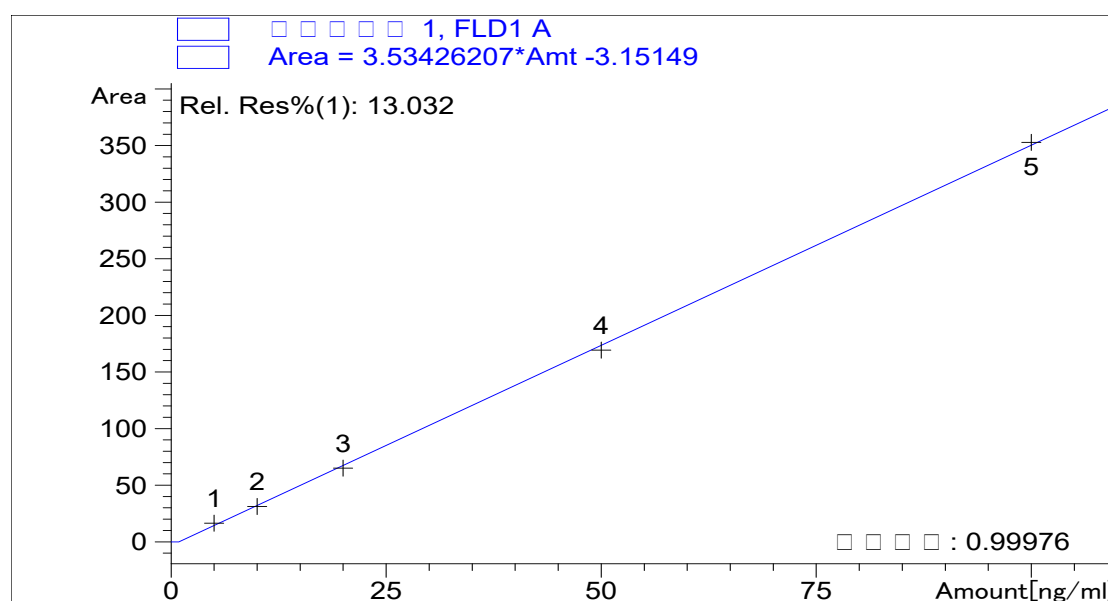

Fig.S2 The calibration curve of BaP

## 2. Adsorption mechanism equation

### 2.1 First order dynamic equation

$$q_t = q_e(1 - e^{-k_1 t}) \quad (\text{Eq. S1})$$

Where,  $q_t$  is amount of adsorption at time  $t$ ,  $q_e$  is adsorption amount at equilibrium,  $t$  is experimental time (in mins) and  $k_1$  is reaction rate constant.

### 2.2 Second order dynamic equation

$$\frac{t}{q_t} = \frac{1}{k_2 q_e^2} + \frac{1}{q_e} t \quad (\text{Eq. S2})$$

Where,  $q_t$ ,  $q_e$  and  $t$  stands for the same thing as Eq.1,  $k_2$  is the second order kinetic rate constant.

2.3 Intra particle diffusion equation

$$q_t = k_t t^{\frac{1}{2}} + c \quad (\text{Eq. S3})$$

Where  $k_t$  is intra particle diffusion rate constant and  $c$  is the constant related to the thickness and boundary of the adsorbent.

2.4 Langmuir equation

$$\frac{1}{q_e} = \frac{1}{q_m} + \frac{1}{k_l q_m c_e} \quad (\text{Eq. S4})$$

Where  $q_e$  is the concentration of adsorbents per unit mass,  $c_e$  is the concentration of equilibrium solution,  $q_m$  represents the maximum adsorption capacity of adsorbent monolayer, and the adsorption coefficient  $k_l$  represents the adsorption surface strength constant.

2.5 Freundlich equation

$$\lg c_s = \lg k_f + \frac{1}{n} \lg c_e \quad (\text{Eq. S5})$$

where  $c_s$  is the mass concentration of adsorption,  $c_e$  is the concentration of equilibrium solution,  $k_f$  is the constant of the model and  $\frac{1}{n}$  reflects the degree of nonlinearity of adsorption.

2.6 Temkin equation

$$q_e = B_T \ln \frac{K}{A} + B_T \ln c_e \quad (\text{Eq. S6})$$

Where  $B_T$  is the adsorption coefficient of heat of adsorbent (J/mole),  $A$  is the reciprocal of the adsorption coefficient,  $K$  is slope,  $T$  is the experimental temperature (298K) and  $R$  is the real value of gas constant (8.314J/mole/K) respectively.

**3 Graph of the fitting equation**

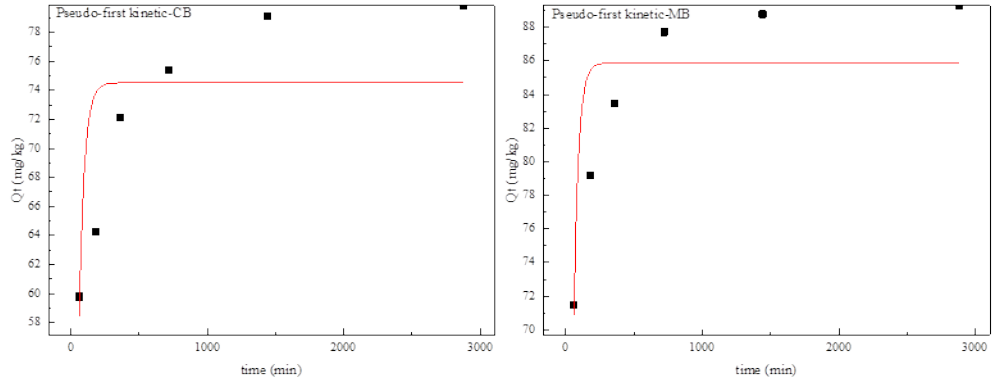

Fig.S3 Pseudo-first kinetic dynamic equation fitting curve

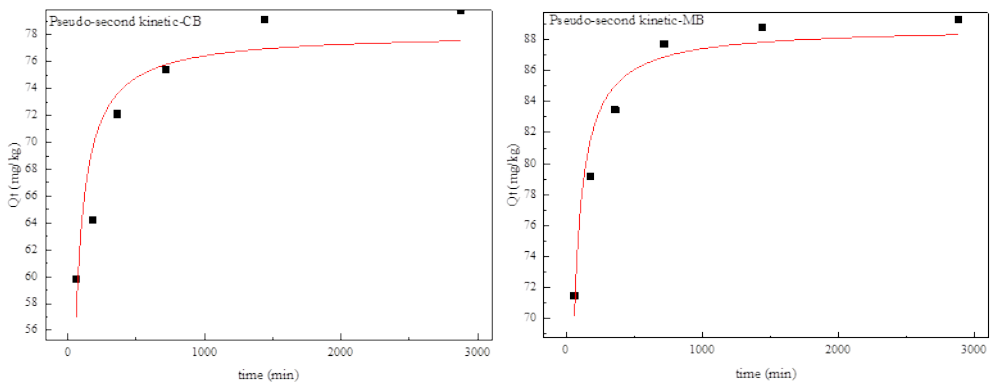

Fig.S4 Pseudo-second kinetic dynamic equation fitting curve

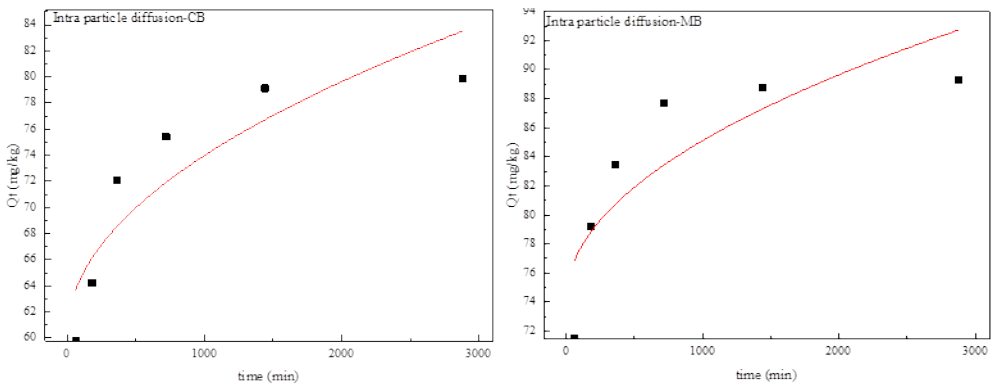

Fig.S5 Intra particle diffusion equation fitting curve

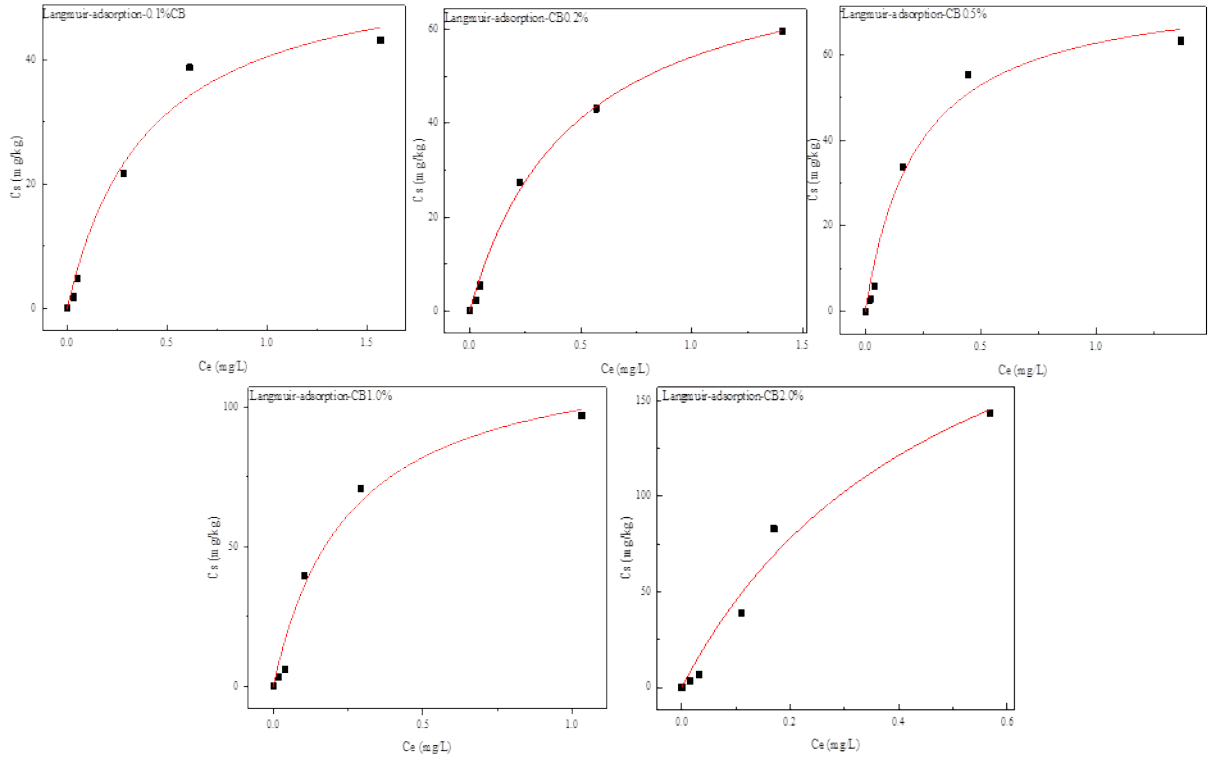

Fig.S6 Langmuir adsorption isotherm fitting curve of CB Biochar soil

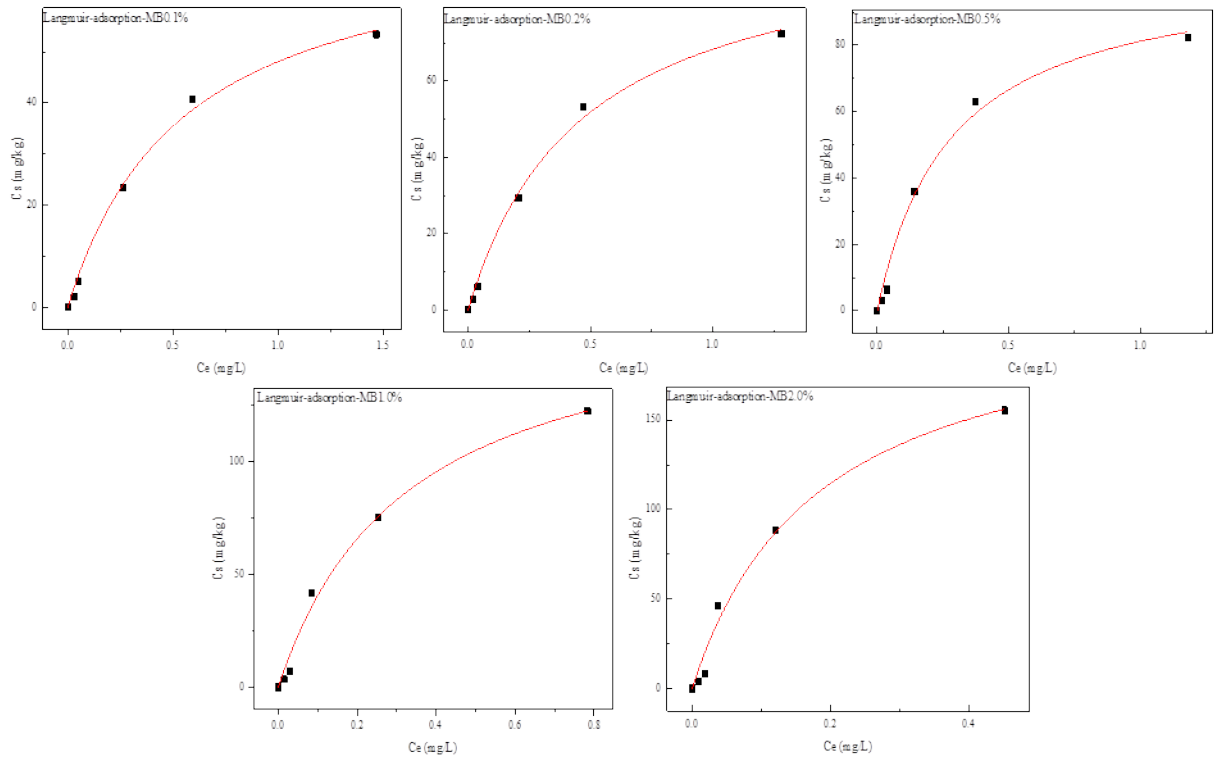

Fig.S7 Langmuir adsorption isotherm fitting curve of MB Biochar soil

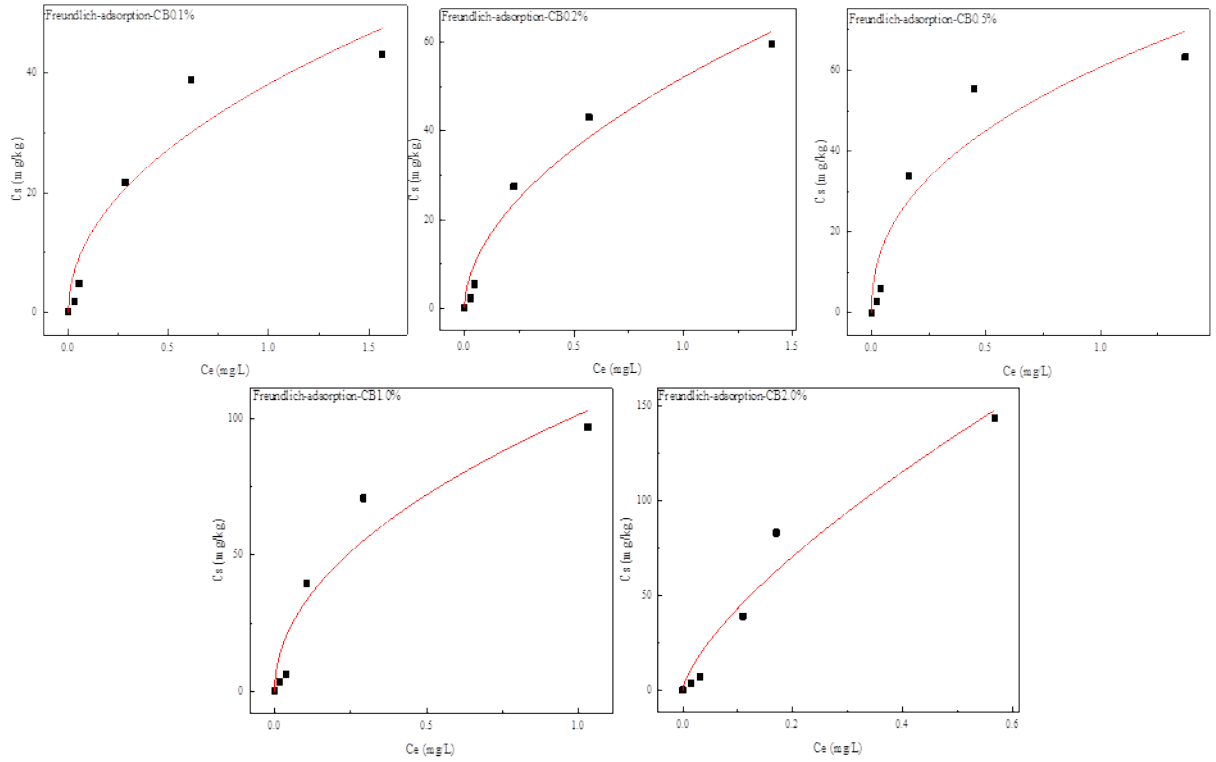

Fig.S8 Freundlich adsorption isotherm fitting curve of CB Biochar soil

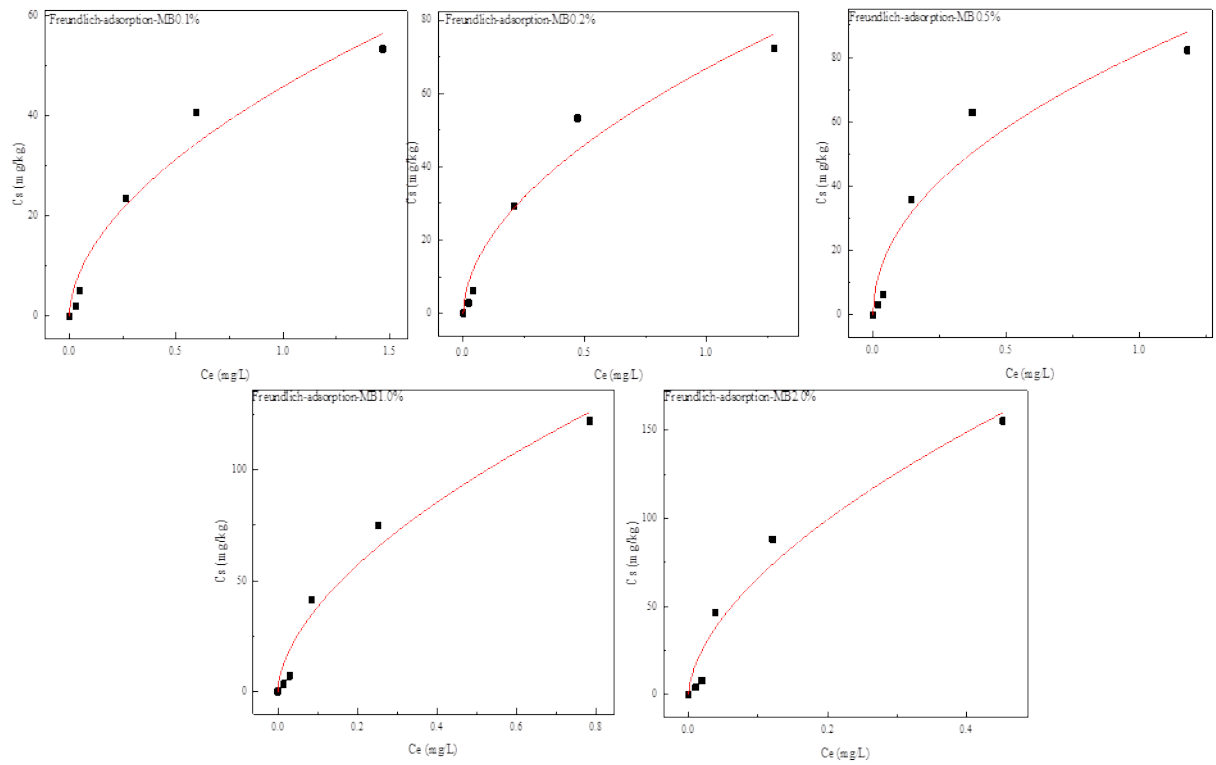

Fig.S9 Freundlich adsorption isotherm fitting curve of MB Biochar soil

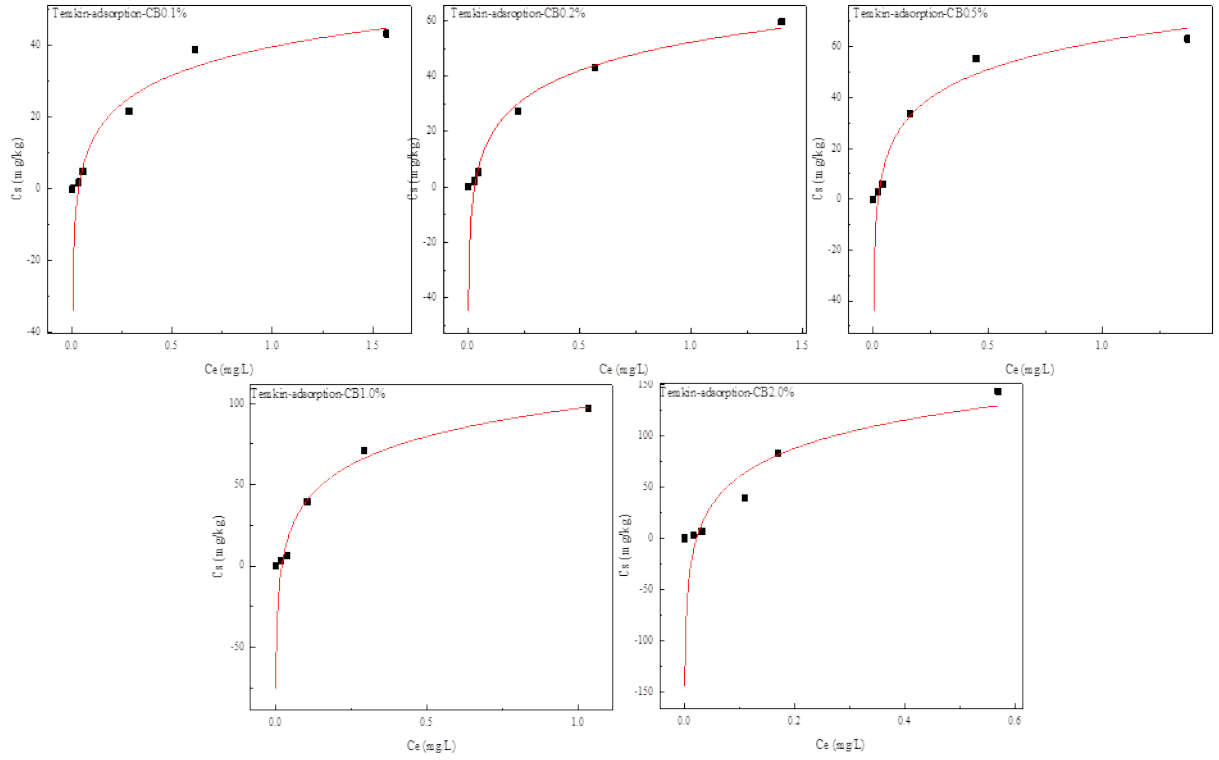

Fig.S10 Temkin adsorption isotherm fitting curve of CB Biochar soil

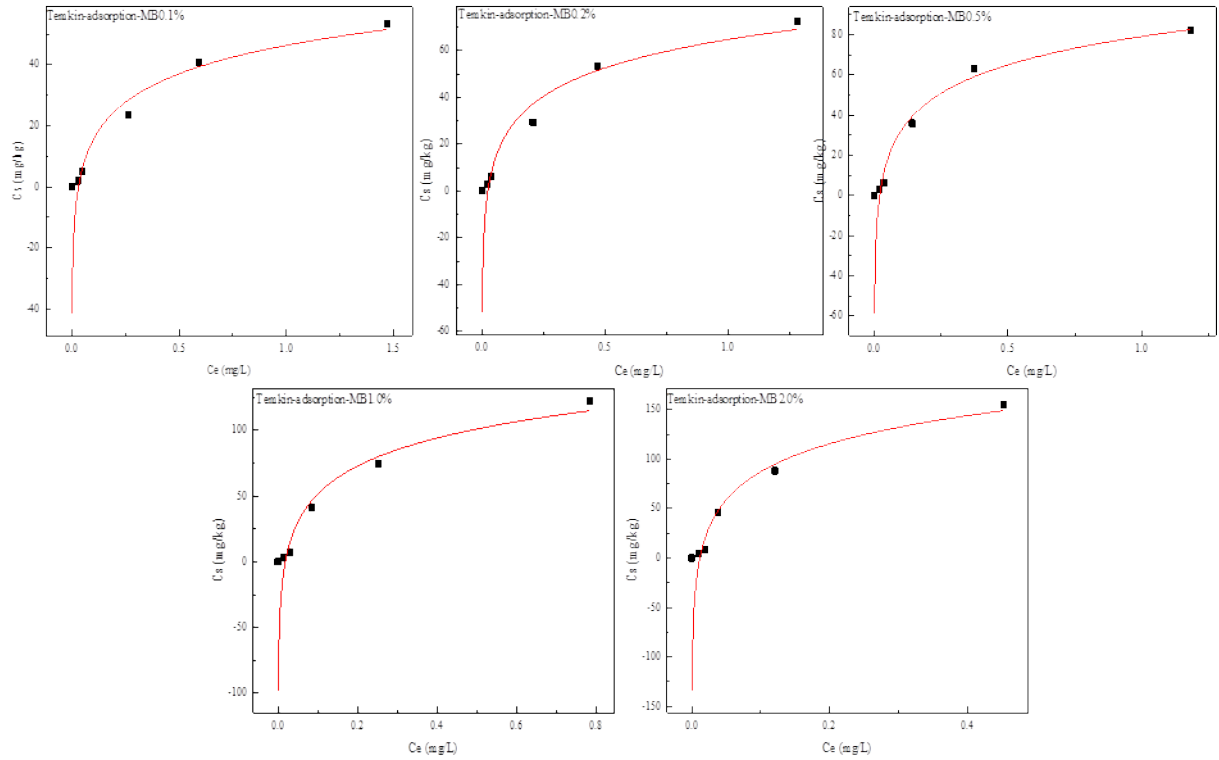

Fig.S11 Temkin adsorption isotherm fitting curve of MB Biochar soil

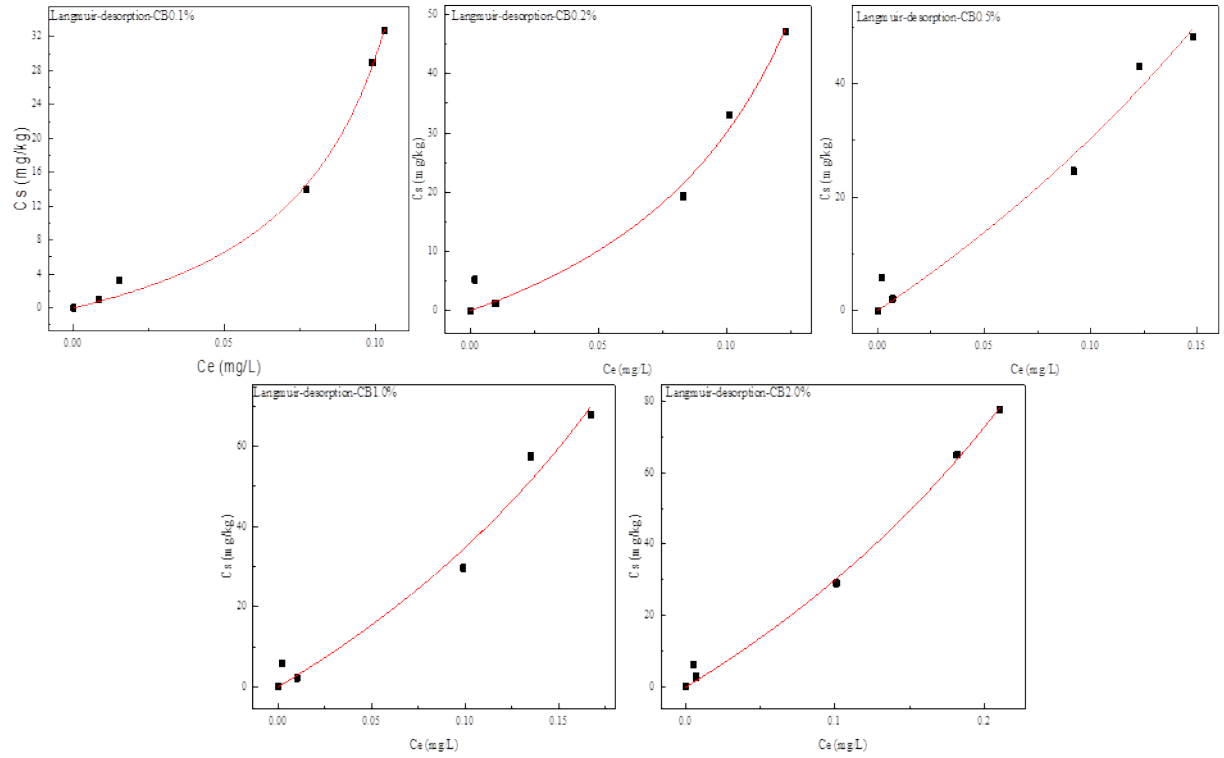

Fig.S12 Langmuir desorption isotherm fitting curve of CB Biochar soil

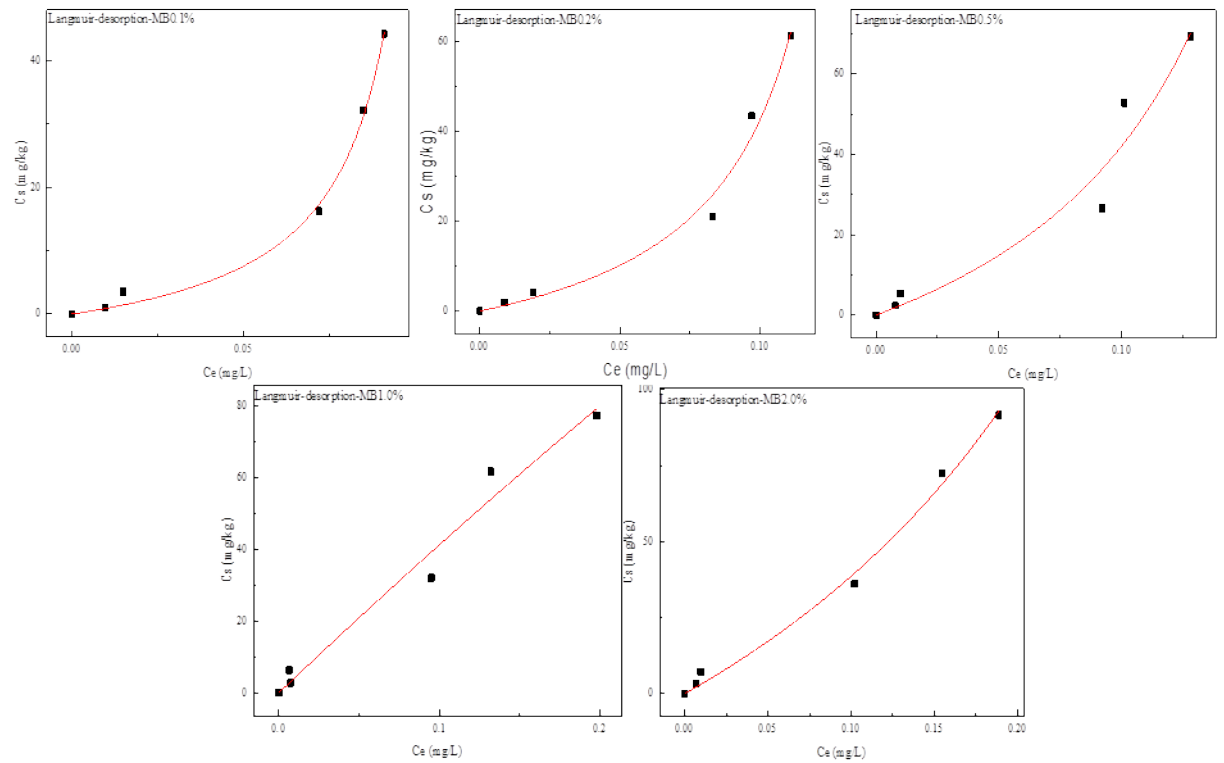

Fig.S13 Langmuir desorption isotherm fitting curve of MB Biochar soil

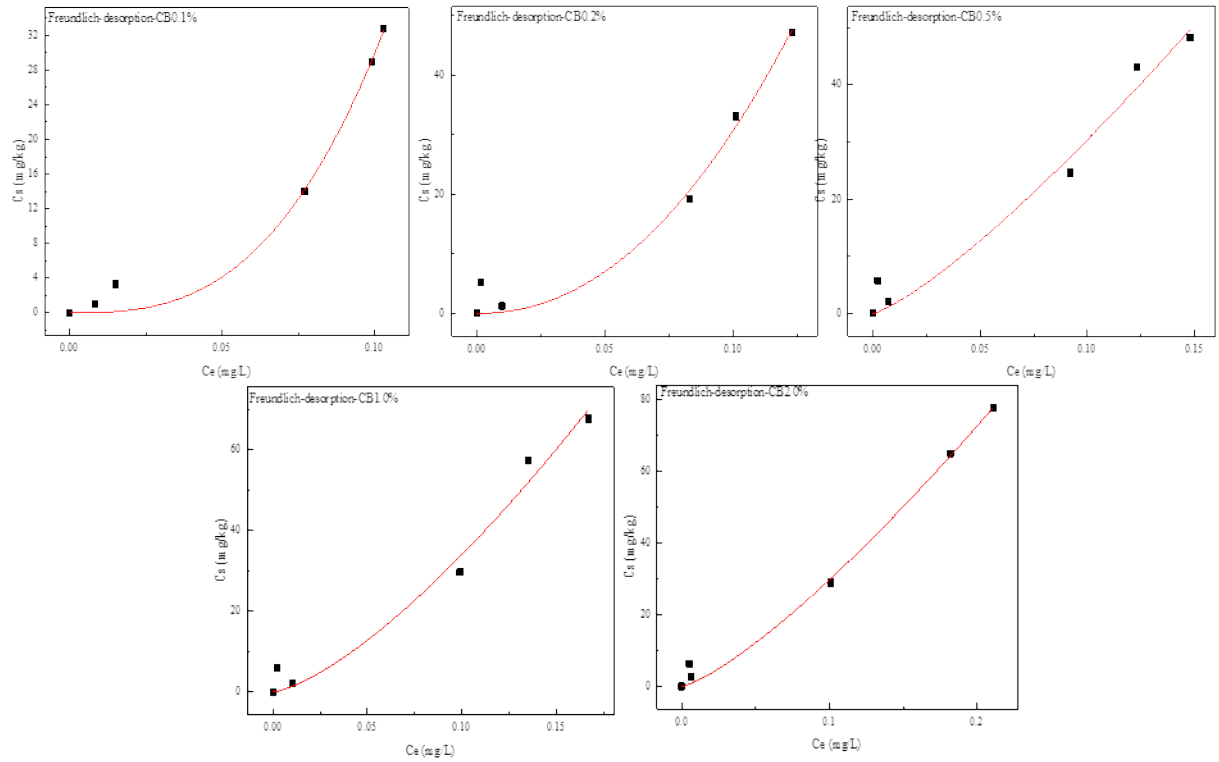

Fig.S14 Freundlich desorption isotherm fitting curve of CB Biochar soil

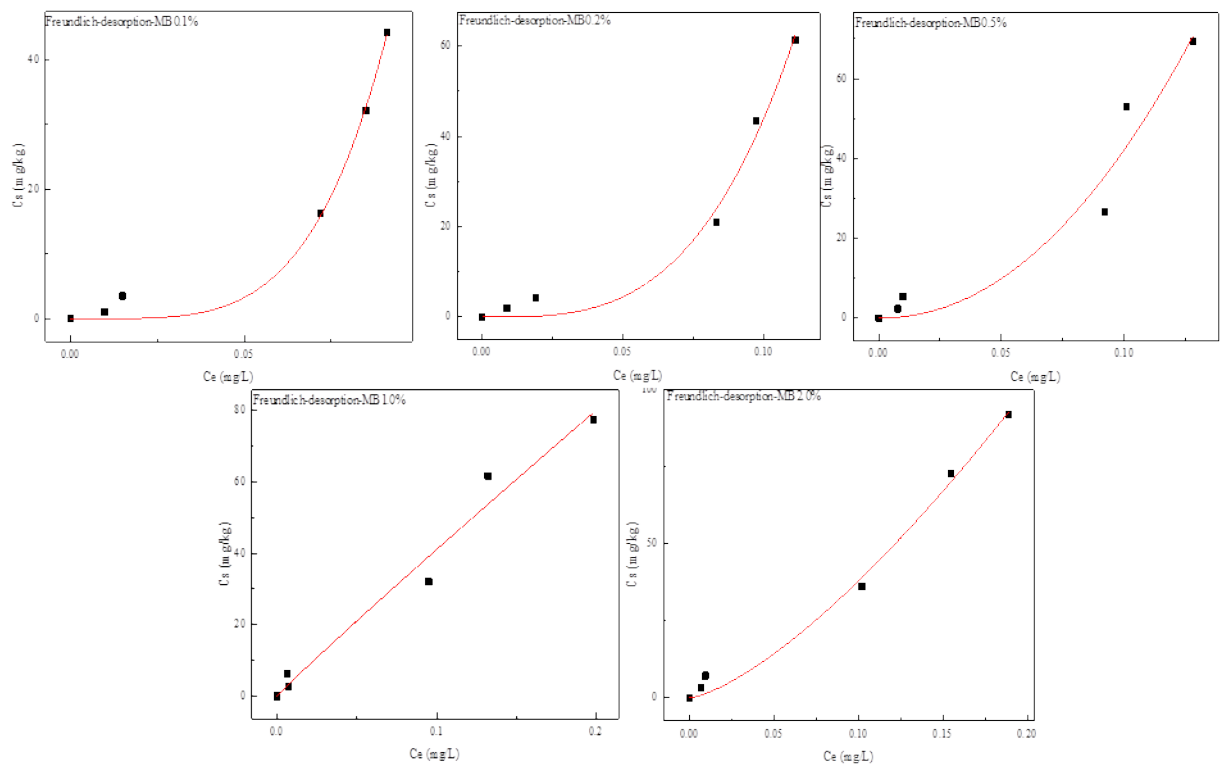

Fig.S15 Freundlich desorption isotherm fitting curve of MB Biochar soil



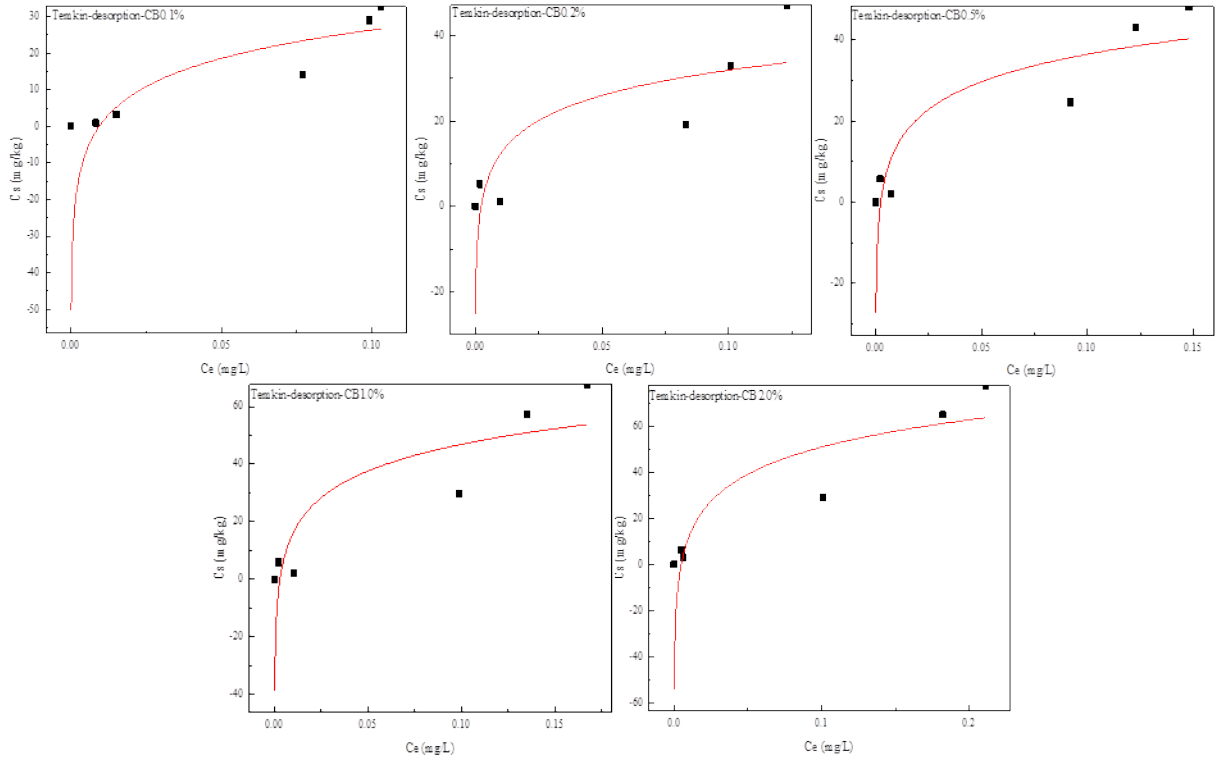

Fig.S16 Temkin desorption isotherm fitting curve of CB Biochar soil

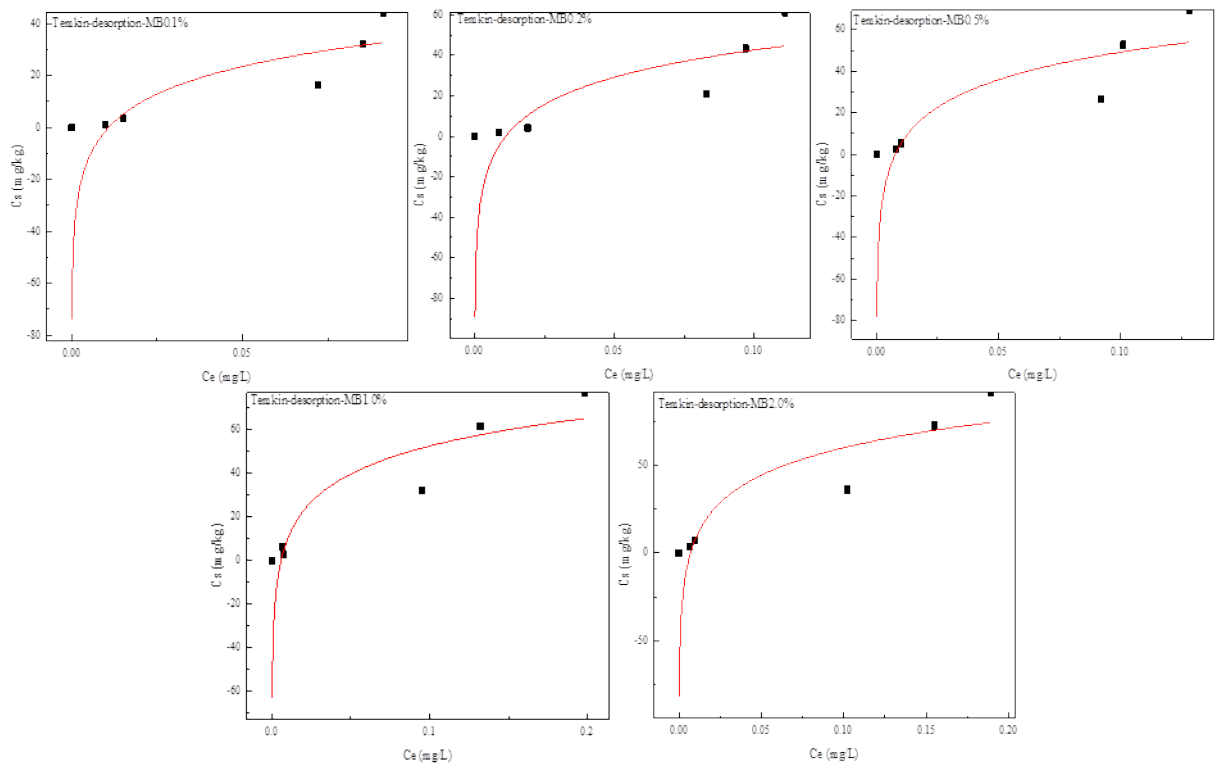

Fig.S17 Temkin desorption isotherm fitting curve of MB Biochar soil
